# Supplementary material for: Raman optical activity study of deuterated sugars: deuterium labelling as a tool for structural analysis
Source: Royal Society of Chemistry journal article supplement (doi:10.1039/d4cp02406k), 2024-01-01
Supplement: d4cp02406k1.pdf [file d4cp02406k1.pdf]

## **Raman optical activity study of deuterated sugars: deuterium labelling as a tool for structural analysis**

Tohru Taniguchi,<sup>\*a</sup> Davidson Obinna Agbo,<sup>a</sup> Qin Yang,<sup>b</sup> Josef Kapitán,<sup>c</sup> Tao Wu,<sup>b</sup>  
Shuki Oyama,<sup>d</sup> Shuji Akai,<sup>d</sup> Yoshinari Sawama,<sup>d</sup> and Petr Bouř<sup>\*b</sup>

<sup>a</sup> *Frontier Research Center for Advanced Material and Life Science, Faculty of Advanced Life Science,  
Hokkaido University, North 21 West 11, Sapporo 001-0021, Japan.*

<sup>b</sup> *Institute of Organic Chemistry and Biochemistry, Academy of Sciences, Flemingovo náměstí 2, 16610 Prague,  
Czech Republic.*

<sup>c</sup> *Department of Optics, Palacký University Olomouc, 17. listopadu 12, 77146 Olomouc, Czech Republic.*

<sup>d</sup> *Graduate School of Pharmaceutical Sciences, Osaka University, Suita, Osaka 565-0871, Japan.*

### **Supporting Information**

|     |                                 |
|-----|---------------------------------|
| S2  | Supporting Figures S1-S5        |
| S6  | Supporting Table S1             |
| S26 | Optimized Cartesian Coordinates |

## Supporting Figures

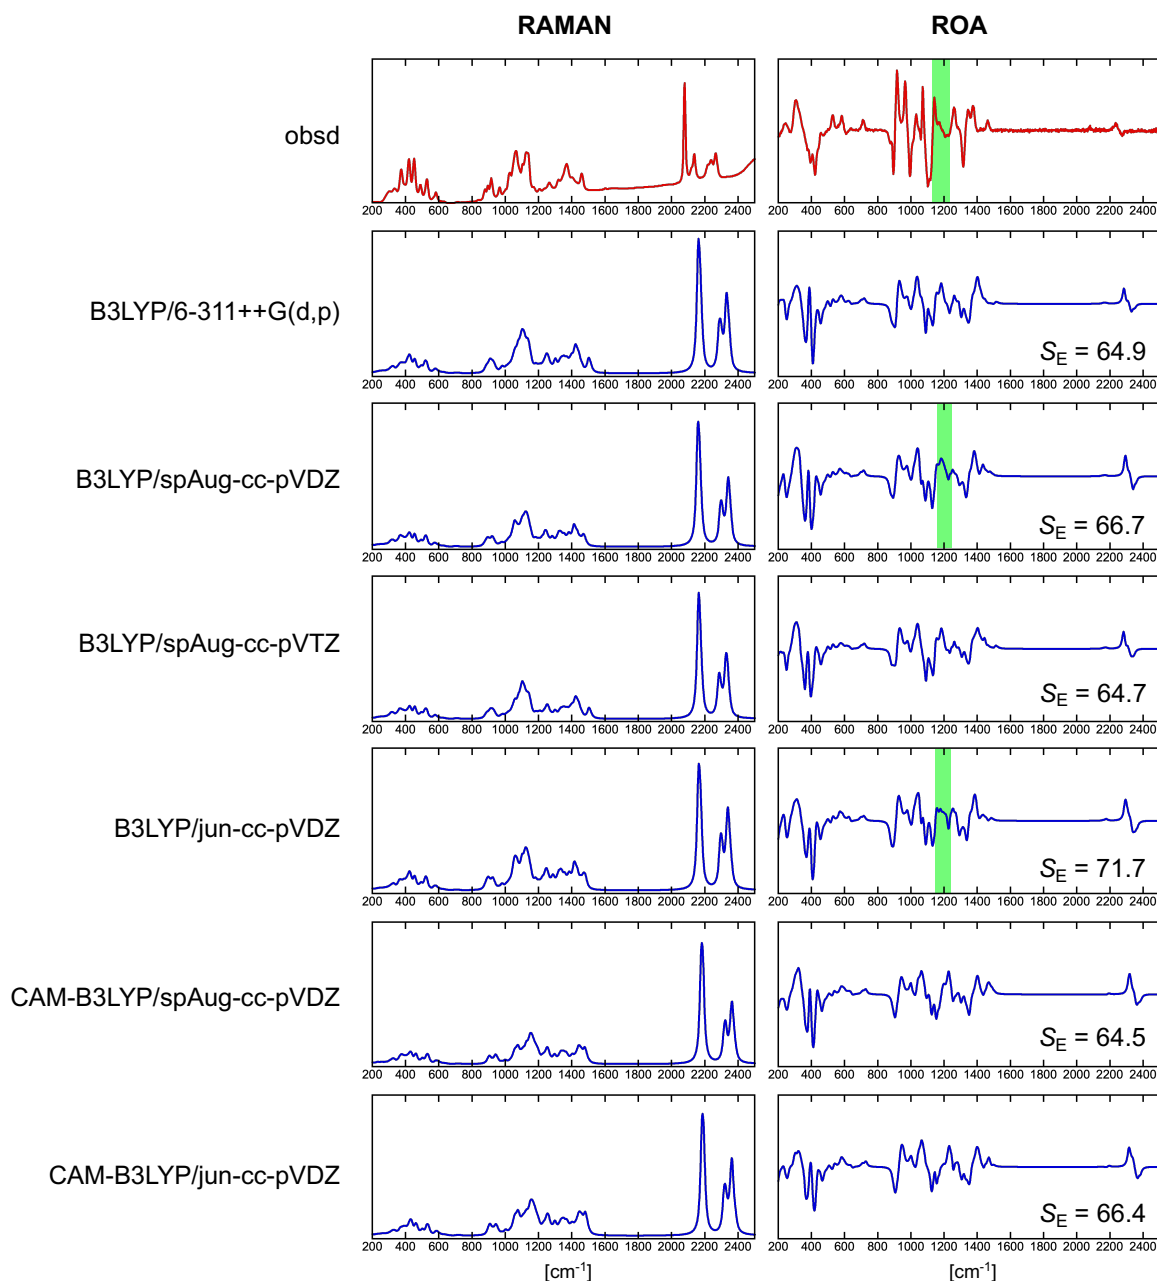

**Fig. S1** Test for several QM conditions for calculating Raman and ROA spectra of  $CD_3$ - $\beta$ -Glc by a QM/MM method considering 20 snapshots. ROA spectral similarity ( $S_E$ ) was obtained using CompareVOA software using the spectral region below 1500  $cm^{-1}$ . B3LYP/spAug-cc-pVDZ and B3LYP/jun-cc-pVDZ conditions showed higher values than the others. With using qualitative comparisons, B3LYP/spAug-cc-pVDZ was selected for spectral calculations in this study. For example, in the highlighted region around 1200  $cm^{-1}$ , positive signals predicted by B3LYP/jun-cc-pVDZ were weak, whereas the other conditions showed moderately strong positive signals.

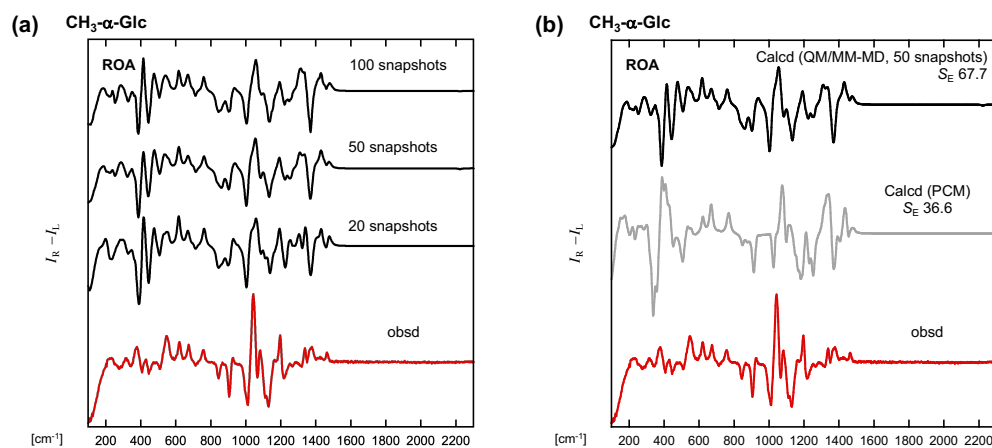

**Fig. S2** Comparison of observed and calculated ROA spectra of **CD<sub>3</sub>-α-Glc**. (a) Comparison of the QM/MM spectra obtained by averaging 100, 50, and 20 snapshots. The ROA spectrum simulated by 50 snapshots was almost superimposable to that obtained by 100 snapshots, with differences in the intensity of several peaks. This observation led us to consider that 50 snapshots is satisfactory for this study. (b) Comparison of results calculated by QM/MM-MD and PCM. (b) PCM calculation was performed for a single molecule of **CD<sub>3</sub>-α-Glc** at the B3LYP/spAug-cc-pVDZ with PCM for water (see computational details). ROA spectral similarity ( $S_E$ ) was obtained using CompareVOA software using the spectral region below 1500  $\text{cm}^{-1}$ .

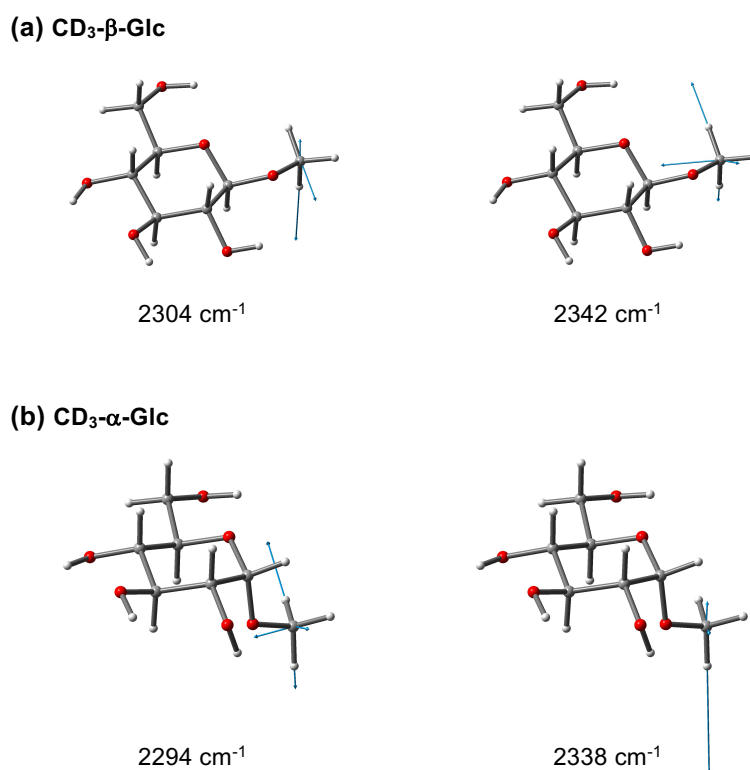

**Fig. S3** Vibrational modes of (a) **CD<sub>3</sub>-β-Glc** and (b) **CD<sub>3</sub>-α-Glc** exhibiting a pair of positive and negative signals in the C-D stretching region. Displacement vectors (arbitrary length) of each atom are shown as arrows.

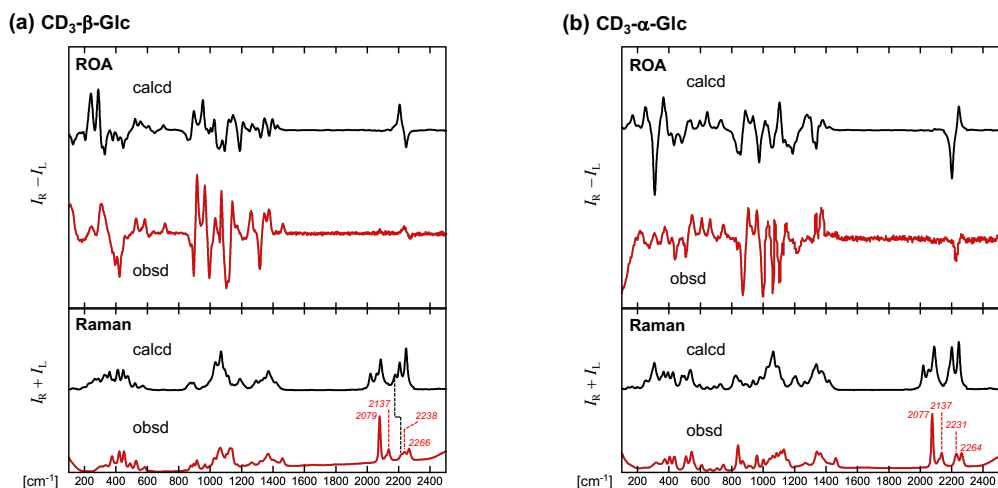

**Fig. S4** Comparison of observed (red) and anharmonically calculated PCM (black) ROA and Raman spectra of (a) **CD<sub>3</sub>-β-Glc** and (b) **CD<sub>3</sub>-α-Glc**. Calculated spectra were obtained by Boltzmann-averaging of the spectra of three conformers. In the Raman spectra in the C-D stretching region, anharmonic calculations predicted several signals. For example, a shoulder (indicated by a dotted line) appearing at the lower frequency side of the peak at 2238 cm<sup>-1</sup> of **CD<sub>3</sub>-β-Glc** was reproduced in the anharmonic theoretical spectra. Anharmonic Raman spectra of both sugars also exhibited additional signals that may correspond to the experimental peak at 2137 cm<sup>-1</sup>; however, relative intensity of the signals appearing at 2079/2077 cm<sup>-1</sup> and 2137 cm<sup>-1</sup> was not reproduced. In addition to the discrepancy in the C-D stretching region, the overall agreement between their Raman and ROA spectra remains to be improved in future studies.

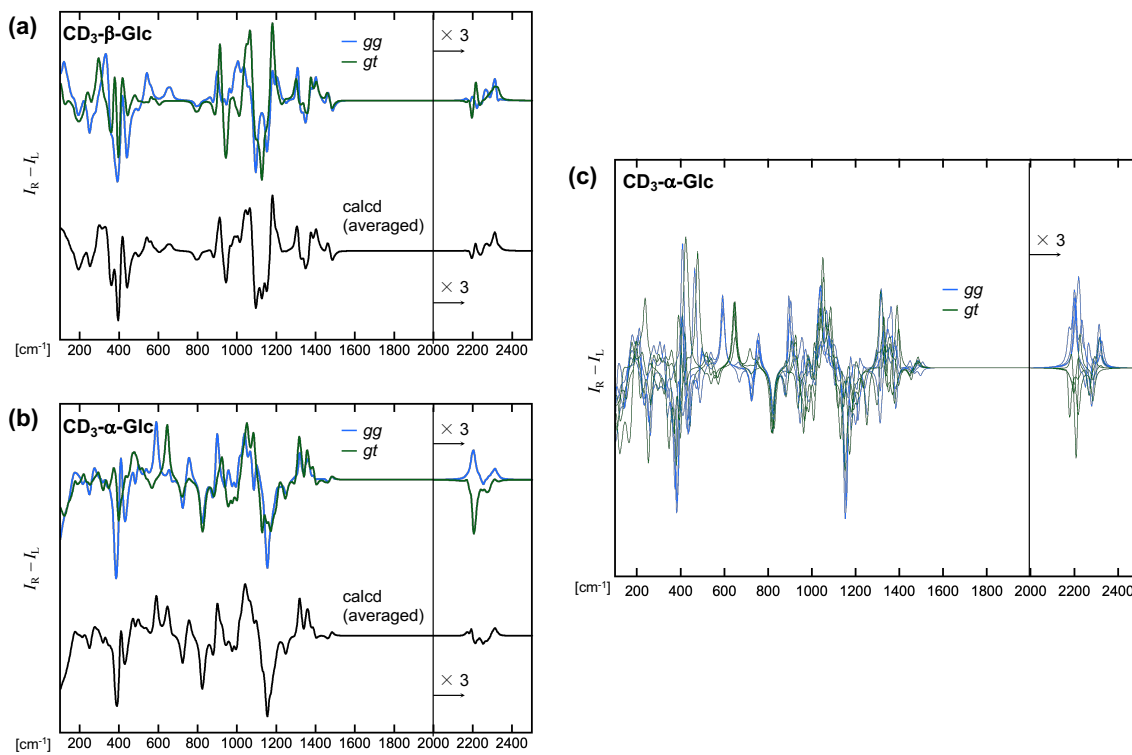

**Fig. S5** Comparison of calculated QM/MM ROA spectra of conformers of (a)  $\text{CD}_3\text{-}\beta\text{-Glc}$  and (b)  $\text{CD}_3\text{-}\alpha\text{-Glc}$  differing in their C-6 hydroxymethyl orientation. Fifty snapshots were considered for obtaining the final calculated QM/MM ROA spectra (black) as described in Computational details on QM/MM-MD calculations. These 50 snapshots were classified into those with  $gg$  and  $gt$  conformers, and their ROA spectra were averaged to simulate the ROA spectra for  $gg$  conformers (blue) and  $gt$  conformers (green). (c) Calculated QM/MM ROA spectra of  $\text{CD}_3\text{-}\alpha\text{-Glc}$  of each of randomly selected snapshots with  $gg$  (blue) and  $gt$  conformers (green). In the region around 2200  $\text{cm}^{-1}$ ,  $gg$  conformers of  $\text{CD}_3\text{-}\alpha\text{-Glc}$  showed a positive signal whereas its  $gt$  conformers tend to show a negative one. The intensity of ROA spectra above 2000  $\text{cm}^{-1}$  is multiplied by a factor of 3 for clarity.

**Table S1** Assignment of the vibrational bands for (a) **CH<sub>3</sub>- $\alpha$ -Glc**, (b) **CD<sub>3</sub>- $\beta$ -Glc**, (c) **CD<sub>3</sub>- $\alpha$ -Glc**, (d) **CH<sub>3</sub>- $\beta$ -Glc-*d*<sub>5</sub>**, and (e) **CH<sub>3</sub>- $\alpha$ -Glc-*d*<sub>5</sub>**. For the assignment for **CH<sub>3</sub>- $\beta$ -Glc**, see J. R. Cheeseman, M. S. Shaik, P. L. A. Popelier, E. W. Blanch, *J. Am. Chem. Soc.* 2011, **133**, 4991.

(a) **CH<sub>3</sub>- $\alpha$ -Glc** (*gt* conformer)

| wavenumber<br>[cm <sup>-1</sup> ] | intensity (arb. units) |      | Modes                                                                           |
|-----------------------------------|------------------------|------|---------------------------------------------------------------------------------|
|                                   | Raman                  | ROA  |                                                                                 |
| 204                               | 1                      | -6   | OH twist                                                                        |
| 251                               | 2                      | 18   | OH4 twist, OH2 twist                                                            |
| 316                               | 5                      | 3    | OH twist                                                                        |
| 325                               | 12                     | 20   | OH twist                                                                        |
| 340                               | 2                      | -69  | OH4 twist                                                                       |
| 359                               | 7                      | -102 | OH6 twist, OH3 twist                                                            |
| 387                               | 21                     | 85   | OH6 twist                                                                       |
| 407                               | 14                     | 45   | ring def, OH2 twist                                                             |
| 418                               | 6                      | -18  | OH2 twist                                                                       |
| 429                               | 4                      | 19   | ring def, OH2 twist                                                             |
| 452                               | 7                      | -24  | ring def, OH2 twist, OH6 twist                                                  |
| 553                               | 28                     | 15   | ring breathing, C4-C5-O5 bend                                                   |
| 568                               | 5                      | -16  | ring def, C3-C4-C5 bend                                                         |
| 606                               | 3                      | -5   | ring def, O3-C3-C4 bend, C5-C6-O6 bend                                          |
| 672                               | 6                      | 94   | ring def, C1-C2-O2 bend                                                         |
| 769                               | 9                      | 48   | ring def, O5-C1-C2 bend                                                         |
| 848                               | 28                     | -65  | ring def, CH <sub>2</sub> bend, $\nu$ C5-O5                                     |
| 913                               | 29                     | -107 | ring def                                                                        |
| 1020                              | 1                      | -35  | $\nu$ C3-C4, C3-OH3 bend                                                        |
| 1030                              | 13                     | -137 | CH <sub>2</sub> bend, C6-OH6 bend, $\nu$ C1-O1, ring def                        |
| 1049                              | 10                     | -37  | $\nu$ C6-O6, $\nu$ <sub>s</sub> C5-O5-C1, ring def, C6-OH6 bend                 |
| 1072                              | 7                      | 195  | $\nu$ C3-O3, $\nu$ O1-C, $\nu$ C1-C2, $\nu$ C4-C5                               |
| 1084                              | 15                     | 77   | $\nu$ C6-O6, $\nu$ C5-C1                                                        |
| 1103                              | 23                     | 50   | $\nu$ O1-C, C4-OH4 bend, $\nu$ C4-C5                                            |
| 1107                              | 41                     | -58  | $\nu$ O5-C1, $\nu$ C2-O2, $\nu$ C6-O6, C3-OH3 bend, ring def                    |
| 1119                              | 19                     | -13  | ring def, C4-OH4 bend, $\nu$ C4-O4, $\nu$ O1-C                                  |
| 1131                              | 34                     | 7    | ring def, $\nu$ C3-O3, C3-OH3 bend, C6-OH6 bend, $\nu$ C4-O4                    |
| 1155                              | 11                     | 57   | ring def, $\nu$ C2-O2, $\nu$ C4-O4, CH <sub>3</sub> def, C3-OH3 bend            |
| 1165                              | 10                     | -6   | CH <sub>3</sub> def                                                             |
| 1166                              | 24                     | -134 | CH <sub>3</sub> def, $\nu$ <sub>as</sub> C5-O5-C1, $\nu$ <sub>as</sub> C2-C3-O3 |

|      |    |      |                                                                       |
|------|----|------|-----------------------------------------------------------------------|
| 1181 | 10 | -190 | vC2-C3, CH <sub>3</sub> def                                           |
| 1210 | 8  | 58   | ring H torsions, CH <sub>2</sub> bend, C3-OH3 bend                    |
| 1211 | 13 | 65   | ring H torsions, CH <sub>3</sub> def                                  |
| 1230 | 13 | -335 | ring H torsions, CH <sub>2</sub> bend, C6-OH6 bend                    |
| 1250 | 7  | 44   | ring H torsions, C4-OH4 bend, C2-OH2 bend                             |
| 1254 | 22 | -215 | ring H torsions, C3-OH3 bend, C2-OH2 bend                             |
| 1309 | 15 | 8    | ring H torsions, vC1-C2, C2-OH2 bend, C3-OH3 bend                     |
| 1314 | 4  | 185  | ring H torsions, CH <sub>2</sub> bend, C3-OH3 bend, C4-OH4 bend       |
| 1345 | 11 | 169  | ring H torsions, C4-OH4 bend                                          |
| 1353 | 10 | 56   | ring H torsions, CH <sub>2</sub> bend, C3-OH3 bend, C4-OH4 bend       |
| 1369 | 22 | -142 | C1-H torsion, C2-H torsion                                            |
| 1377 | 43 | -318 | C1-H torsion, C5-H torsion, CH <sub>2</sub> bend, C6-OH6 bend         |
| 1386 | 8  | 236  | C1-H torsion, C5-H torsion, C6-OH6 bend                               |
| 1405 | 10 | -55  | vC2-C3, CH <sub>2</sub> bend, C3-H torsion, C2-H torsion, C2-OH2 bend |
| 1423 | 19 | 51   | CH <sub>2</sub> bend, C6-OH6 bend, C4-OH4 bend                        |
| 1431 | 8  | 69   | ring H torsions, C2-OH2 bend, ring def                                |
| 1440 | 14 | 194  | ring def, ring H torsions, vC3-C4                                     |
| 1450 | 19 | -15  | CH <sub>3</sub> def                                                   |
| 1458 | 20 | -52  | CH <sub>3</sub> def                                                   |
| 1464 | 20 | -12  | v <sub>as</sub> C4-C5-C6, ring def, C4-OH4 bend, CH <sub>2</sub> bend |
| 1470 | 26 | 1    | CH <sub>2</sub> bend                                                  |
| 1473 | 20 | 33   | CH <sub>3</sub> def                                                   |

---

**CH<sub>3</sub>- $\alpha$ -Glc** (*gg* conformer)

| wavenumber<br>[cm <sup>-1</sup> ] | intensity (arb. units) |      | Modes                                                                                                                         |
|-----------------------------------|------------------------|------|-------------------------------------------------------------------------------------------------------------------------------|
|                                   | Raman                  | ROA  |                                                                                                                               |
| 221                               | >0                     | 6    | OH twist, C1-O1-C twist                                                                                                       |
| 233                               | 3                      | -23  | OH twist, C1-O1-C twist                                                                                                       |
| 253                               | >0                     | -7   | OH twist, CH <sub>2</sub> bend                                                                                                |
| 272                               | 2                      | 10   | OH twist, CH <sub>2</sub> bend                                                                                                |
| 306                               | 2                      | 33   | ring def, OH3 twist, OH4 twist                                                                                                |
| 319                               | 10                     | -32  | ring def, C1-O1-C bend, OH4 twist, OH6 twist                                                                                  |
| 337                               | 1                      | -6   | OH twist                                                                                                                      |
| 357                               | 3                      | -12  | ring def, OH twist                                                                                                            |
| 361                               | 8                      | -62  | OH6 twist                                                                                                                     |
| 409                               | 8                      | 54   | ring def, OH2 twist                                                                                                           |
| 415                               | 5                      | 33   | OH2 twist                                                                                                                     |
| 450                               | 17                     | -37  | ring def, OH2 twist, C1-O1-C bend                                                                                             |
| 510                               | 22                     | -46  | C3-C4-C5 bend, CH <sub>2</sub> bend                                                                                           |
| 534                               | 4                      | 38   | O2-C2-C3 bend, C3-C4-O4 bend, C5-C6-O6 bend                                                                                   |
| 558                               | 15                     | 6    | ring breathing, O2-C2-C3 bend                                                                                                 |
| 621                               | 13                     | 76   | O1-C1-C2 bend                                                                                                                 |
| 713                               | 10                     | 5    | C5-C6-O6 bend, C1-C2-O2 bend                                                                                                  |
| 773                               | 6                      | 57   | O5-C1-C2 bend                                                                                                                 |
| 876                               | 34                     | -36  | ring def, CH <sub>2</sub> bend                                                                                                |
| 915                               | 34                     | -146 | ring def, CH <sub>2</sub> bend                                                                                                |
| 932                               | 21                     | 42   | ring def, $\nu$ C5-C6, CH <sub>2</sub> bend<br>ring def, $\nu$ C5-O5, C3-OH3 bend, $\nu$ C2-O2, C2-OH2 bend, $\nu$ C6-O6, C6- |
| 1026                              | 9                      | -183 | OH6 bend                                                                                                                      |
| 1035                              | 6                      | 167  | ring def, $\nu$ C4-O4, C3-OH3 bend, C4-OH4 bend, $\nu$ C6-O6                                                                  |
| 1056                              | 18                     | 15   | ring def, C2-OH2 bend, C3-OH3 bend, $\nu$ C1-O1                                                                               |
| 1082                              | 10                     | 171  | $\nu$ C1-C2, $\nu$ C3-O3, $\nu$ C4-C5, $\nu$ C6-O6                                                                            |
| 1099                              | 9                      | -192 | $\nu_{as}$ C5-O5-C1, $\nu_{as}$ C1-O1-C, $\nu$ C2-O3, C4-OH4 bend                                                             |
| 1108                              | 37                     | 148  | ring def, $\nu$ O1-CH <sub>3</sub> , $\nu$ C2-O2, C2-OH2 bend, C3-OH3 bend                                                    |
| 1123                              | 10                     | 90   | ring def, $\nu$ C4-O4, C4-OH4 bend, $\nu_{as}$ C4-C5-C6, CH <sub>2</sub> bend, C6-OH6 bend                                    |
| 1129                              | 24                     | -36  | $\nu$ C3-O3, C3-OH3 bend, $\nu$ C2-O2, C1-C2-C3 bend                                                                          |
| 1149                              | 26                     | -174 | $\nu$ C4-O4, C3-OH3 bend, $\nu_{as}$ C5-C6-O6, $\nu$ C2-O2, C2-OH2 bend                                                       |
| 1162                              | 18                     | -159 | CH <sub>3</sub> def, $\nu_{as}$ C1-O5-C5, $\nu_{as}$ O2-C2-C3, $\nu$ C3-O3                                                    |
| 1166                              | 3                      | 14   | CH <sub>3</sub> def                                                                                                           |
| 1181                              | 14                     | 11   | $\nu$ C2-C3, CH <sub>3</sub> def                                                                                              |



|      |    |      |                                                                               |
|------|----|------|-------------------------------------------------------------------------------|
|      |    |      | ring H bend, C3-OH3 bend, C4-OH4 bend, C2-OH2 bend, CH <sub>2</sub> bend, C6- |
| 1206 | 7  | -35  | OH6 bend                                                                      |
| 1213 | 11 | 43   | CH <sub>3</sub> def, vC1-O1, C3-OH3 bend, ring H torsions                     |
| 1237 | 14 | 41   | ring H torsions, CH <sub>2</sub> bend, C2-OH2 bend, C4-OH4 bend, C6-OH6 bend  |
| 1247 | 21 | -55  | C4-H torsion, C4-OH4 bend, C3-OH3 bend                                        |
| 1256 | 18 | -87  | ring H torsions, C2-OH2 bend, C3-OH3 bend                                     |
| 1309 | 13 | -9   | ring H torsions, C2-OH2 bend, C3-OH3 bend                                     |
| 1329 | 17 | 276  | ring H torsions, C4-OH4 bend, C3-OH3 bend                                     |
| 1339 | 7  | 77   | C5-H torsion, C4-H torsion                                                    |
| 1360 | 9  | -155 | C3-OH3 bend, CH <sub>2</sub> torsion, C6-OH6 bend                             |
| 1368 | 44 | -211 | C1-H torsion, C2-H torsion, C2-OH2 bend, C6-OH6 bend                          |
| 1373 | 6  | 193  | ring H torsions, CH <sub>2</sub> bend, C6-OH6 bend, C4-OH4 bend               |
| 1385 | 15 | -73  | C1-H torsion                                                                  |
| 1407 | 11 | -38  | ring H torsions, vC2-C3, CH <sub>2</sub> bend, C2-OH2 bend                    |
| 1419 | 29 | -31  | CH <sub>2</sub> bend, ring H torsions                                         |
| 1432 | 10 | 68   | ring H torsions, ring def, C2-OH2 bend                                        |
| 1443 | 12 | 64   | ring def, vC3-C4, C3-OH3 bend, C2-OH2 bend                                    |
| 1452 | 17 | -16  | CH <sub>3</sub> def                                                           |
| 1456 | 23 | -114 | CH <sub>3</sub> def                                                           |
| 1461 | 17 | 200  | v <sub>as</sub> C4-C5-C6, C4-OH4 bend, CH <sub>2</sub> bend                   |
| 1464 | 30 | -73  | CH <sub>2</sub> bend                                                          |
| 1475 | 18 | 34   | CH <sub>3</sub> def                                                           |

---

(b) **CD<sub>3</sub>-β-Glc** (*gt* conformer)

| wavenumber<br>[cm <sup>-1</sup> ] | intensity (arb. units) |      | Modes                                                                                                                                 |
|-----------------------------------|------------------------|------|---------------------------------------------------------------------------------------------------------------------------------------|
|                                   | Raman                  | ROA  |                                                                                                                                       |
| 214                               | 1                      | -24  | OH2 twist, OH4 twist, C1-O1-C bending, ring def                                                                                       |
| 247                               | 1                      | 14   | OH4 twist, ring def                                                                                                                   |
| 276                               | 3                      | 50   | OH3 twist, OH6 twist, ring def                                                                                                        |
| 317                               | 8                      | 50   | OH twist, ring def                                                                                                                    |
| 322                               | 7                      | 50   | OH twist, ring def                                                                                                                    |
| 337                               | 2                      | -28  | OH2 twist, OH3 twist, ring def                                                                                                        |
| 357                               | 8                      | -137 | OH3 twist, OH6 twist, ring def                                                                                                        |
| 384                               | 22                     | 43   | OH4 twist, OH6 twist, ring def                                                                                                        |
| 399                               | 10                     | -26  | ring def, OH twist                                                                                                                    |
| 428                               | 14                     | 10   | OH twist, ring def                                                                                                                    |
| 456                               | 15                     | 20   | OH twist, ring def                                                                                                                    |
| 495                               | 20                     | -10  | OH twist, ring def                                                                                                                    |
| 588                               | 11                     | 3    | OH twist, ring def                                                                                                                    |
| 624                               | >0                     | 10   | OH twist, ring def                                                                                                                    |
| 644                               | 1                      | -9   | OH twist, ring def                                                                                                                    |
| 884                               | 8                      | -92  | ring def, CH <sub>2</sub> bend, CD <sub>3</sub> torsion                                                                               |
| 900                               | 8                      | -18  | CD <sub>3</sub> def                                                                                                                   |
| 921                               | 9                      | 79   | ring def, CH <sub>2</sub> bend, CD <sub>3</sub> torsion                                                                               |
| 988                               | 6                      | 96   | vC1-O1, CD <sub>3</sub> bend, vC3-O3, ring def                                                                                        |
| 1018                              | 5                      | -53  | C3-OH3 bend, vC3-C4, C2-OH2 bend, vC5-C6, CD <sub>3</sub> torsion, C4-OH4 bend                                                        |
| 1045                              | 4                      | 65   | vC1-O5, C3-OH3 bend, C4-OH4 bend, vC3-C4, vC2-O2, vC4-C5                                                                              |
| 1047                              | 12                     | -21  | CD <sub>3</sub> def                                                                                                                   |
| 1059                              | 8                      | 61   | CD <sub>3</sub> def                                                                                                                   |
| 1067                              | 3                      | -157 | CH <sub>3</sub> def, vC1-O5, C2-OH2 bend, vC2-C3, vC5-C6, ring def                                                                    |
| 1070                              | 10                     | -154 | CH <sub>3</sub> def, C2-OH2 bend, vC4-C5, vC5-C6, vC6-O6, ring def<br>C2-OH2 bend, C4-OH4 bend, vC6-O6, ring def, vC1-O5, vC2-O2, C2- |
| 1085                              | 40                     | 244  | OH2 bend, vC2-C3<br>C1-O1 stretch, vC2-O2, C3-OH3 bend, C4-OH4 bend, vC4-C5, C6-OH6                                                   |
| 1109                              | 12                     | 10   | bend, ring def                                                                                                                        |
| 1112                              | 25                     | -6   | vC5-O5, vC6-O6, vO1-C, C3-OH3 bend, C4-OH4 bend                                                                                       |

|      |     |      |                                                                                                                                                   |
|------|-----|------|---------------------------------------------------------------------------------------------------------------------------------------------------|
| 1122 | 28  | 20   | vC3-O3, C3-OH3 bend, C2-OH2 bend, vC5-C6, vC4-O4, vC5-O5                                                                                          |
| 1133 | 18  | -16  | vO1-CH <sub>3</sub> , CD <sub>3</sub> def, ring def, vC2-O2                                                                                       |
| 1137 | 53  | -48  | ring breathing, vC3-O3, vC2-O2, vC4-O4                                                                                                            |
| 1159 | 34  | -191 | vC5-C6, C1-O5-C5 bend, C3-C4-C5 bend                                                                                                              |
| 1179 | 27  | 161  | vC1-C2, vC2-O2, C2-C1-H bend, vC4-O4                                                                                                              |
| 1199 | 2   | 123  | ring H torsion, C5-C6-H bend, CH <sub>2</sub> bend                                                                                                |
| 1217 | 4   | 99   | ring H torsion, vC1-O1, ring def                                                                                                                  |
| 1225 | 21  | -183 | ring H torsion, CH <sub>2</sub> bend, OH bend                                                                                                     |
| 1238 | 24  | -364 | ring H torsion, CH <sub>2</sub> bending, OH bend, vC1-O1                                                                                          |
| 1251 | 6   | 111  | ring H torsion, CH <sub>2</sub> bending, C4-OH4 bend, vC1-O1                                                                                      |
| 1295 | 2   | -41  | ring H torsion, C2-OH2 bend, OH bend                                                                                                              |
| 1310 | 9   | 153  | CH <sub>2</sub> bend, ring H torsions, C3-OH3 bend, C4-OH4 bend                                                                                   |
| 1336 | 14  | 78   | ring H torsions, CH <sub>2</sub> bend, C2-OH2 bend, C3-OH3 bend                                                                                   |
| 1339 | 12  | -17  | ring H torsions, CH <sub>2</sub> bend, C2-OH2 bend, C3-OH3 bend, vC5-O5<br>ring H torsions, C2-OH2 bend, C3-OH3 bend, C4-OH4 bend, C6-OH6         |
| 1362 | 12  | -77  | bend                                                                                                                                              |
| 1368 | 22  | -209 | ring H torsions, C5-C6-H bend, C6-OH6 bend                                                                                                        |
| 1397 | 11  | 249  | ring H torsions, C5-C6-H bend, C6-OH6 bend, ring def<br>ring H torsions, CH <sub>2</sub> bend, C2-OH2 bend, vC4-C5, C6-OH6 bend, C4-OH4           |
| 1420 | 18  | 68   | bend                                                                                                                                              |
| 1433 | 10  | -96  | ring H torsions, vC1-C2, vC3-O3, CH <sub>2</sub> bend                                                                                             |
| 1435 | 27  | 58   | ring H torsions, v <sub>as</sub> C2-C3-C4, ring def, C3-OH3 bend                                                                                  |
| 1440 | 11  | -26  | ring H torsions, CH <sub>2</sub> bend, C2-OH2 bend, ring def<br>ring H torsions, v <sub>as</sub> C4-C5-C6, C4-OH4 bend, C6-OH6 bend, C2-OH2 bend, |
| 1463 | 23  | 47   | vC1-C2                                                                                                                                            |
| 1470 | 28  | 81   | CH <sub>2</sub> bend                                                                                                                              |
| 2179 | 428 | -38  | v <sub>s</sub> CD <sub>3</sub>                                                                                                                    |
| 2320 | 135 | 271  | v <sub>as</sub> CD <sub>3</sub>                                                                                                                   |
| 2358 | 218 | -189 | v <sub>as</sub> CD <sub>3</sub>                                                                                                                   |

---

**CD<sub>3</sub>-β-Glc** (*gg* conformer)

| wavenumber<br>[cm <sup>-1</sup> ] | intensity (arb. units) |      | Modes                                                                                                         |
|-----------------------------------|------------------------|------|---------------------------------------------------------------------------------------------------------------|
|                                   | Raman                  | ROA  |                                                                                                               |
| 232                               | 4                      | -20  | OH twist                                                                                                      |
| 259                               | >0                     | 10   | CH <sub>2</sub> bend, OH6 twist                                                                               |
| 267                               | 1                      | -8   | OH twist, C1-O1-C bending, C5-O5-C1 bending                                                                   |
| 293                               | 3                      | -14  | OH2 twist, OH4 twist                                                                                          |
| 301                               | 9                      | 41   | OH3 twist                                                                                                     |
| 321                               | 7                      | 29   | OH4 twist, OH2 twist                                                                                          |
| 338                               | 1                      | -61  | OH twist                                                                                                      |
| 348                               | 5                      | -65  | OH3 twist, OH4 twist                                                                                          |
| 359                               | 6                      | 47   | OH6 twist                                                                                                     |
| 421                               | 13                     | 2    | ring def, OH6 twist                                                                                           |
| 425                               | 11                     | -14  | ring def, OH6 twist                                                                                           |
| 453                               | 25                     | -70  | ring def, ring H torsions                                                                                     |
| 533                               | 30                     | 58   | ring def                                                                                                      |
| 571                               | 7                      | 38   | ring def, CH <sub>2</sub> bend, OH6 twist                                                                     |
| 611                               | 2                      | 9    | ring def, C1-O1-C bend                                                                                        |
| 720                               | 2                      | 48   | ring def, C5-C6-O bend                                                                                        |
| 894                               | 10                     | 36   | ring def, O1-C bend, CH <sub>2</sub> bend                                                                     |
| 900                               | 5                      | -134 | CD <sub>3</sub> def, CH <sub>2</sub> bend                                                                     |
| 925                               | 10                     | 47   | CH <sub>2</sub> bend, ring def                                                                                |
| 933                               | 22                     | 32   | νC5-C6, CD <sub>3</sub> def, H-C5-C6 bend, νC3-O3                                                             |
| 988                               | 7                      | 119  | νO1-C, CD <sub>3</sub> def, ring def, νC2-C3<br>νC3-C4, νC4-O4, νC3-O3, νC3-O2, C2-OH2 bend, C3-OH3 bend, C4- |
| 1038                              | 9                      | 48   | OH4 bend, νC6-O6                                                                                              |
| 1047                              | 12                     | 45   | CD <sub>3</sub> def                                                                                           |
| 1052                              | 6                      | 138  | νC2-C3, C3-OH3 bend, νC3-O3, νC6-O6, CD <sub>3</sub> def, νC2-O2                                              |
| 1059                              | 7                      | -19  | CD <sub>3</sub> def                                                                                           |
| 1072                              | 34                     | 197  | νC5-O5, νC6-O6, νC1-C2, C2-OH2 bend, ring H torsions                                                          |
| 1077                              | 22                     | -271 | νC1-O5, νC6-O6                                                                                                |
| 1099                              | 4                      | -63  | ν <sub>as</sub> C1-O5-C5, ring H torsions                                                                     |
| 1114                              | 18                     | -24  | νC2-O2, νC3-O3, ν <sub>as</sub> C3-C4-C5, C3-OH3 bend, CH <sub>2</sub> bend, C6-OH6 bend                      |
| 1126                              | 17                     | 83   | νC4-O4, νC3-O3, ν <sub>as</sub> C5-C6-O6, C2-OH2 bend, C4-OH4 bend                                            |

|      |     |      |                                                                                                                                                                       |
|------|-----|------|-----------------------------------------------------------------------------------------------------------------------------------------------------------------------|
| 1131 | 22  | -53  | vO1-C, CD <sub>3</sub> def, v <sub>as</sub> C1-C2-O2                                                                                                                  |
| 1137 | 36  | -35  | v <sub>as</sub> C2-C3-O3, C2-OH2 bend, vC2-O2, ring breathing                                                                                                         |
| 1153 | 37  | -311 | vC5-O5, vC4-O4, C3-OH3 bend, vC1-O1, ring def                                                                                                                         |
| 1177 | 26  | 61   | v <sub>as</sub> C1-C2-O2, ring H torsions, C3-OH3 bend                                                                                                                |
| 1200 | 13  | 105  | ring H torsions, OH bend, v <sub>as</sub> C1-O1-C                                                                                                                     |
| 1209 | 2   | 67   | ring H torsions, OH-bend, v <sub>as</sub> C1-O1-C, CH <sub>2</sub> bend                                                                                               |
| 1232 | 16  | -49  | ring H torsions, C2-OH2 bend, C3-OH3 bend, v <sub>as</sub> C1-O1-C                                                                                                    |
| 1241 | 11  | 252  | ring H torsions, C3-OH3 bend, C4-OH4 bend, CH <sub>2</sub> bend, C6-OH6 bend                                                                                          |
| 1248 | 25  | -8   | ring H torsions, C4-OH4 bend, CH <sub>2</sub> bend, C6-OH6 bend                                                                                                       |
| 1294 | 2   | -57  | ring H torsions, C2-OH2 bend                                                                                                                                          |
| 1325 | 18  | 196  | ring H torsions, C3-OH3 bend, C4-OH4 bend                                                                                                                             |
| 1336 | 14  | -250 | ring H torsions                                                                                                                                                       |
| 1339 | 16  | -4   | ring H torsions, C2-OH2 bend, C3-OH3 bend                                                                                                                             |
| 1373 | 17  | 75   | ring H torsions, C4-OH4 bend, CH <sub>2</sub> bend, C6-OH6 bend                                                                                                       |
| 1391 | 18  | 53   | ring H torsions, C5-C6-H bend                                                                                                                                         |
| 1416 | 17  | -73  | CH <sub>2</sub> bend, C6-OH6 bend, vC5-C6                                                                                                                             |
| 1430 | 12  | -69  | ring H torsions, vC1-C2                                                                                                                                               |
| 1438 | 35  | 12   | ring H torsions, vC2-C3, C2-OH2 bend, C3-OH3 bend                                                                                                                     |
| 1441 | 8   | -73  | ring H torsions, v <sub>as</sub> C3-C4-C5, C2-OH2 bend, C3-OH3 bend, C4-OH4 bend<br>ring H torsions, vC4-C5, vC1-C2, C2-OH2 bend, C4-OH4 bend, v <sub>as</sub> C1-C2- |
| 1460 | 25  | 274  | C3                                                                                                                                                                    |
| 1465 | 29  | -83  | CH <sub>2</sub> bend                                                                                                                                                  |
| 2179 | 422 | -23  | v <sub>s</sub> CD <sub>3</sub>                                                                                                                                        |
| 2320 | 134 | 307  | v <sub>as</sub> CD <sub>3</sub>                                                                                                                                       |
| 2358 | 218 | -143 | v <sub>as</sub> CD <sub>3</sub>                                                                                                                                       |

---

(c) **CD<sub>3</sub>- $\alpha$ -Glc** (*gt* conformer)

| wavenumber<br>[cm <sup>-1</sup> ] | intensity (arb. units) |      |  | Modes                                                                                 |
|-----------------------------------|------------------------|------|--|---------------------------------------------------------------------------------------|
|                                   | Raman                  | ROA  |  |                                                                                       |
| 239                               | 2                      | 15   |  | OH4 twist, OH2 twist                                                                  |
| 269                               | 2                      | 10   |  | OH3 twist, OH4 twist, ring def                                                        |
| 292                               | 6                      | 4    |  | OH twist, C1-O1-C bend                                                                |
| 301                               | 6                      | 39   |  | OH twist                                                                              |
| 318                               | 5                      | -107 |  | OH twist                                                                              |
| 338                               | 5                      | -80  |  | OH6 twist, OH3 twist                                                                  |
| 374                               | 24                     | 74   |  | OH6 twist, OH2 twist, ring def                                                        |
| 388                               | 6                      | 144  |  | OH2 twist, OH6 twist                                                                  |
| 401                               | 14                     | -97  |  | ring def, OH2 twist, OH6 twist                                                        |
| 422                               | 6                      | 8    |  | ring def                                                                              |
| 440                               | 8                      | -38  |  | ring def, C1-O1-C bend, CH <sub>2</sub> bend, OH6 twist, OH2 twist                    |
| 547                               | 27                     | 14   |  | ring breathing, CH <sub>2</sub> bend                                                  |
| 557                               | 10                     | -14  |  | ring def, C2-OH2 bend                                                                 |
| 656                               | 6                      | 106  |  | ring def, C1-O1-H bend, C2-OH2 bend, CH <sub>2</sub> bend                             |
| 751                               | 12                     | 39   |  | O5-C1-C2 bend                                                                         |
| 834                               | 31                     | -53  |  | CH <sub>2</sub> bend, CH <sub>3</sub> def                                             |
| 861                               | 15                     | -134 |  | CD <sub>3</sub> def, CH <sub>2</sub> bend, ring def, C6-OH6 bend                      |
| 902                               | 5                      | 76   |  | CD <sub>3</sub> def, C1-O1-C bend                                                     |
| 961                               | 16                     | 60   |  | C2-OH2 bend, CD <sub>3</sub> def, C1-O1-C bend                                        |
|                                   |                        |      |  | CD <sub>3</sub> def, $\nu$ C3-C4, $\nu$ C2-O2, C2-OH2 bend, C3-OH3 bend, C4-OH4 bend, |
| 1008                              | 9                      | -111 |  | $\nu$ C6-O6, ring def                                                                 |
| 1014                              | 7                      | -85  |  | $\nu$ C3-C4, CD <sub>3</sub> def, $\nu$ O1-C, C2-OH2 bend, C3-OH3 bend, C4-OH4 bend   |
| 1030                              | 12                     | 21   |  | $\nu$ C5-O5, C6-OH6 bend, CH <sub>2</sub> bend, C4-OH4 bend                           |
| 1042                              | 12                     | -66  |  | CD <sub>3</sub> def                                                                   |
| 1054                              | 5                      | -185 |  | $\nu_{as}$ O1-C1-C2, CD <sub>3</sub> def, $\nu$ C1-O1                                 |
| 1054                              | 13                     | 242  |  | CD <sub>3</sub> def, $\nu$ C4-O4                                                      |
| 1068                              | 12                     | -41  |  | ring def, $\nu$ C1-O5, $\nu$ C6-O6, $\nu$ O1-C, $\nu$ C2-O2, C4-OH4 bend              |
| 1085                              | 11                     | 76   |  | $\nu_{as}$ C5-O5-C1, $\nu$ C4-C5, C4-OH4 bend, $\nu_{as}$ C1-O1-CD                    |
| 1092                              | 36                     | -38  |  | $\nu_{as}$ C5-O5-C1, $\nu$ C6-O6, $\nu$ C2-O2, C3-OH3 bend, $\nu$ C4-O4               |
| 1103                              | 27                     | -67  |  | $\nu$ C3-O3, C4-OH4 bend, $\nu$ C4-C5, $\nu$ C5-C6                                    |
| 1116                              | 40                     | -58  |  | ring def, $\nu$ O1-C, $\nu$ C3-O3, C3-OH3 bend, $\nu$ C4-O4, C6-OH6 bend              |
| 1125                              | 19                     | 110  |  | CD <sub>3</sub> def, $\nu$ O1-C, C3-OH3 bend, $\nu$ C4-O4                             |
| 1149                              | 18                     | -108 |  | ring def, $\nu$ C5-C6, $\nu$ C4-O4, C3-OH3 bend                                       |

|      |     |      |                                                                                                                                                                               |
|------|-----|------|-------------------------------------------------------------------------------------------------------------------------------------------------------------------------------|
| 1155 | 18  | 135  | $\nu_{as}C3-C2-O2$ , ring def, $\nu C3-O3$                                                                                                                                    |
| 1176 | 17  | -103 | $\nu_{as}C1-C2-C3$ , $\nu C1-O1$                                                                                                                                              |
| 1202 | 6   | -26  | ring H torsion, C2-OH2 bend, CH <sub>2</sub> bend                                                                                                                             |
| 1222 | 15  | -350 | ring H torsions, CH <sub>2</sub> bend, C6-OH6 bend, C2-OH2 bend, C3-OH3 bend                                                                                                  |
| 1243 | 10  | -15  | ring H torsion, C6-OH6 bend, C2-OH2 bend, C4-OH4 bend                                                                                                                         |
| 1247 | 24  | -182 | ring H torsion, C2-OH2 bend, C3-OH3 bend, C4-OH4 bend                                                                                                                         |
| 1297 | 15  | 54   | ring-H torsions, $\nu C1-C2$ , C2-OH2 bend, C3-OH3 bend                                                                                                                       |
| 1307 | 5   | 178  | ring-H torsions, CH <sub>2</sub> bend, C4-OH4 bend, C3-OH3 bend                                                                                                               |
| 1337 | 14  | 149  | ring H torsions, CH <sub>2</sub> bend, C6-OH6 bend, C4-OH4 bend                                                                                                               |
| 1344 | 9   | 68   | ring H torsions, CH <sub>2</sub> bend, C3-OH3 bend                                                                                                                            |
| 1358 | 30  | -224 | ring H torsions, $\nu C1-C2$ , C2-OH2 bend                                                                                                                                    |
| 1371 | 42  | -250 | ring H torsions, CH <sub>2</sub> bend, C6-OH6 bend                                                                                                                            |
| 1379 | 11  | 171  | ring H torsions, CH <sub>2</sub> bend, C6-OH6 bend, C2-OH2 bend                                                                                                               |
| 1393 | 9   | -9   | ring H torsions, $\nu C2-C3$ , CH <sub>2</sub> bend, C6-OH6 bend, C2-OH2 bend<br>ring H torsions, $\nu C5-C6$ , CH <sub>2</sub> bend, C6-OH6 bend, C2-OH2 bend, C4-OH4        |
| 1412 | 18  | 115  | bend                                                                                                                                                                          |
| 1419 | 10  | 14   | ring H torsions, $\nu C3-C4$ , CH <sub>2</sub> bend, C2-OH2 bend, C3-OH3 bend<br>ring H torsions, CH <sub>2</sub> bend, $\nu C1-C2$ , $\nu C3-C4$ , C2-OH2 bend, C3-OH3 bend, |
| 1426 | 17  | 225  | C4-OH4 bend                                                                                                                                                                   |
| 1445 | 18  | -62  | $\nu C4-C5$ , C4-OH4 bend, $\nu C5-C6$ , CH <sub>2</sub> bend                                                                                                                 |
| 1462 | 29  | 51   | CH <sub>2</sub> bend                                                                                                                                                          |
| 2165 | 466 | 40   | $\nu_s CD_3$                                                                                                                                                                  |
| 2301 | 163 | -613 | $\nu_{as} CD_3$                                                                                                                                                               |
| 2342 | 204 | 355  | $\nu_{as} CD_3$                                                                                                                                                               |

---

**CD<sub>3</sub>- $\alpha$ -Glc** (*gg* conformer)

| wavenumber<br>[cm <sup>-1</sup> ] | intensity (arb. units) |      |                                                                                                     |
|-----------------------------------|------------------------|------|-----------------------------------------------------------------------------------------------------|
|                                   | Raman                  | ROA  | Modes                                                                                               |
| 221                               | 3                      | -22  | OH twist                                                                                            |
| 240                               | >0                     | -11  | OH6 twist, OH4 twist, CH <sub>2</sub> bend                                                          |
| 259                               | 2                      | 11   | OH twist, CH <sub>2</sub> bend                                                                      |
| 282                               | 3                      | 30   | OH twist                                                                                            |
| 293                               | 9                      | -27  | OH6 twist, OH4 twist                                                                                |
| 333                               | 4                      | -32  | OH6 twist, OH2 twist                                                                                |
| 345                               | 6                      | -54  | OH twist, ring def                                                                                  |
| 386                               | 4                      | 77   | OH2 twist                                                                                           |
| 404                               | 10                     | 9    | ring def, OH2 twist, OH6 twist                                                                      |
| 440                               | 18                     | -37  | ring def, OH2 twist                                                                                 |
| 503                               | 22                     | -48  | ring def, C5-CH6 bend                                                                               |
| 526                               | 5                      | 40   | ring def, C3-C4-O4 bend, C5-C6-O6 bend                                                              |
| 551                               | 15                     | 0    | ring breathing                                                                                      |
| 607                               | 16                     | 72   | ring breathing, C1-O1-C bend, C5-C6-O6 bend                                                         |
| 702                               | 11                     | 32   | ring def, C2-OH2 bend, C5-C6-O6 bend                                                                |
| 757                               | 7                      | 73   | ring def, O5-C5-C4 bend                                                                             |
| 844                               | 33                     | -60  | ring def, CD <sub>3</sub> def                                                                       |
| 880                               | 21                     | -153 | CH <sub>2</sub> bend, ring H torsions, CD <sub>3</sub> def                                          |
| 903                               | 4                      | 83   | CD <sub>3</sub> def                                                                                 |
| 924                               | 19                     | 52   | $\nu_s$ C4-C5-C6, $\nu$ C3-O3                                                                       |
| 963                               | 23                     | -32  | CD <sub>3</sub> def, C1-O1-C bend, ring def                                                         |
| 1011                              | 15                     | -186 | $\nu$ O1-C, CD <sub>3</sub> def, ring def                                                           |
| 1020                              | 10                     | 172  | $\nu$ C5-O5, $\nu$ C6-O6, C6-O6-O bend, ring def                                                    |
| 1031                              | 7                      | 57   | $\nu$ C3-C4, C3-OH3 bend, ring def                                                                  |
| 1042                              | 13                     | -55  | CD <sub>3</sub> def                                                                                 |
| 1054                              | 8                      | -40  | CD <sub>3</sub> def                                                                                 |
| 1069                              | 12                     | -15  | ring def, O5-C1 stretch, CH <sub>2</sub> bend                                                       |
| 1080                              | 6                      | -116 | $\nu_{as}$ O5-C1-O1, $\nu$ C2-O2, $\nu$ O1-C, $\nu$ C5-O5, C4-O1-H bend                             |
| 1090                              | 25                     | 136  | $\nu$ C2-O2, $\nu$ C1-O1, C3-OH3 bend, ring def                                                     |
| 1109                              | 15                     | -7   | $\nu_{as}$ C4-C5-C6, $\nu_{as}$ C3-O3, $\nu_{as}$ C4-O4, C4-OH4 bend, $\nu_{as}$ C6-O6, C6-OH6 bend |
| 1113                              | 34                     | -44  | $\nu_{as}$ C4-C3-O3, CD <sub>3</sub> def                                                            |
| 1125                              | 16                     | 44   | $\nu$ O1-C, CD <sub>3</sub> def, C3-OH3 bend, ring def                                              |
| 1138                              | 23                     | -236 | ring def, $\nu$ C4-O4, $\nu$ C6-O6                                                                  |



|      |     |      |                                                                 |
|------|-----|------|-----------------------------------------------------------------|
| 1156 | 19  | 175  | $\nu_{as}O2-C2-C3$ , $\nu C5-O5$ , ring def                     |
| 1175 | 16  | 54   | $\nu_{as}O1-C1-C2$ , $\nu C2-C3$ , ring def                     |
| 1200 | 7   | -192 | ring H torsions, C2-OH2 bend, C3-OH3 bend, CH <sub>2</sub> bend |
| 1229 | 15  | 59   | CH <sub>2</sub> bend, ring H torsions, C4-OH4 bend, C2-OH2 bend |
| 1240 | 20  | -17  | ring H torsions, C3-OH3 bend, CH <sub>2</sub> bend, C4-OH4 bend |
| 1247 | 23  | -126 | ring H torsions, C2-OH2 bend, C3-OH3 bend, C4-OH4 bend          |
| 1297 | 14  | 42   | ring H torsions, $\nu C1-C2$ , C2-OH2 bend, C3-OH3 bend         |
| 1320 | 17  | 239  | ring H torsions, C3-OH3 bend, C4-OH4 bend                       |
| 1330 | 11  | 56   | ring H torsions                                                 |
| 1350 | 8   | -96  | ring H torsions, $\nu C5-C6$ , C3-OH3 bend                      |
| 1357 | 43  | -253 | ring H torsions, C2-OH2 bend, C6-OH6 bend, $\nu C5-O5$          |
| 1364 | 10  | 141  | ring H torsions, C4-OH4 bend, CH <sub>2</sub> bend, C6-OH6 bend |
| 1378 | 21  | -76  | ring H torsion                                                  |
| 1395 | 11  | 54   | ring H torsions, C2-OH2 bend, $\nu C2-C3$                       |
| 1408 | 29  | -33  | ring H torsions, CH <sub>2</sub> bend, C6-OH6 bend              |
| 1428 | 16  | 137  | ring H torsions, C2-OH2 bend, C3-OH3 bend, $\nu C3-C4$          |
| 1443 | 17  | 99   | $\nu C4-C5$ , ring H torsions, C4-OH4 bend                      |
| 1456 | 29  | -66  | CH <sub>2</sub> bend                                            |
| 2165 | 469 | 14   | $\nu_s CD_3$                                                    |
| 2301 | 167 | -591 | $\nu_{as} CD_3$                                                 |
| 2342 | 205 | 364  | $\nu_{as} CD_3$                                                 |

---

(d) **CH<sub>3</sub>-β-Glc-*d*<sub>5</sub>** (*gt* conformer)

| wavenumber<br>[cm <sup>-1</sup> ] | intensity (arb. units) |      |  | Modes                                                              |
|-----------------------------------|------------------------|------|--|--------------------------------------------------------------------|
|                                   | Raman                  | ROA  |  |                                                                    |
| 237                               | 2                      | 26   |  | OH4 twist                                                          |
| 263                               | 1                      | 45   |  | OH2 twist, OH3 twist                                               |
| 270                               | 3                      | 7    |  | OH2 twist                                                          |
| 292                               | 6                      | 52   |  | OH twist                                                           |
| 303                               | 8                      | 74   |  | OH twist                                                           |
| 310                               | 2                      | -38  |  | OH twist                                                           |
| 335                               | 7                      | -121 |  | OH6 twist                                                          |
| 371                               | 24                     | 57   |  | ring def, C1-O1-C bend                                             |
| 384                               | 15                     | -60  |  | ring def, C5-C6-O6 bend                                            |
| 417                               | 16                     | -5   |  | C2-C3-C4 bend, C5-O5-C1 bend                                       |
| 434                               | 9                      | -12  |  | C1-O1-C bend, C1-C2-C3 bend                                        |
| 463                               | 18                     | -5   |  | ring def, C5-C6-O6 bend                                            |
| 555                               | 8                      | -2   |  | C3-C4-O bend, O2-C2-C3 bend                                        |
| 558                               | 8                      | 16   |  | C1-O1-C bend, C2-C3-O3 bend                                        |
| 606                               | 3                      | -6   |  | O5-C5-C4 bend, O5-C1-C2 bend                                       |
| 787                               | 6                      | -24  |  | CD <sub>2</sub> bend, O5-C5-C6 bend,                               |
| 880                               | 9                      | -82  |  | CD <sub>2</sub> bend, ring D torsion                               |
| 885                               | 8                      | -63  |  | ring D torsions, CD <sub>2</sub> bend                              |
| 916                               | 6                      | 267  |  | ring D torsions, CD <sub>2</sub> bend                              |
| 937                               | 7                      | 6    |  | ring D torsions, C2-OH2 bend                                       |
| 950                               | 17                     | -134 |  | ring D torsions                                                    |
| 956                               | 23                     | -31  |  | ring D torsions, νO1-C                                             |
| 965                               | 7                      | -4   |  | ring D torsions                                                    |
| 979                               | 19                     | 57   |  | CD <sub>2</sub> bend, νC6-O6, ring D torsions, C3-OH3 bend         |
| 988                               | 2                      | -54  |  | CD <sub>2</sub> bend, νC6-O6, ring D torsions, C3-OH3 bend, νC3-C4 |
| 1016                              | 12                     | -47  |  | ring def, νC6-O6, νO1-C, νC2-O2, CD <sub>2</sub> bend              |
| 1038                              | 6                      | 40   |  | νC1-O5, CD <sub>2</sub> bend, νC4-C5                               |
| 1049                              | 4                      | 213  |  | ring breathing, νC4-C5, C4-OH4 bend, CD <sub>2</sub> bend          |
| 1068                              | 36                     | 198  |  | CH <sub>3</sub> def, νC1-C2, CD <sub>2</sub> bend                  |
| 1075                              | 5                      | 53   |  | νO5-C1, ring def, CD <sub>2</sub> bend, νC2-O2,                    |
| 1099                              | 21                     | -206 |  | νO5-C5, νO1-C, νC1-C2, νC3-O3, νC4-O4                              |
| 1114                              | 47                     | -318 |  | CD <sub>2</sub> bend, ring def, νC6-O6, νO1-C                      |
| 1126                              | 20                     | -161 |  | ν <sub>as</sub> C4-C5-O5, C4-OH4 bend, ring def                    |

|      |     |      |                                                                                                                                                     |
|------|-----|------|-----------------------------------------------------------------------------------------------------------------------------------------------------|
| 1155 | 11  | -69  | vC2-O2, C1-C2-C3 bend, CH <sub>3</sub> def, vO1-C                                                                                                   |
| 1157 | 4   | -85  | CH <sub>3</sub> def                                                                                                                                 |
| 1174 | 23  | -8   | v <sub>as</sub> C5-C6-O6, CD <sub>2</sub> bend, vC4-O4, C3-OH3 bend                                                                                 |
| 1184 | 26  | 327  | ring breathing, v <sub>as</sub> O2-C2-C3, vC3-O3, C2-OH2 bend                                                                                       |
| 1189 | 25  | 113  | CH <sub>3</sub> def, ring H torsions, vC5-C6, C3-OH3 bend                                                                                           |
| 1198 | 37  | -66  | ring H torsions, vC1-C2, C2-C3-C4 bend, vC3-O3, vC4-O4                                                                                              |
| 1232 | 10  | -46  | CH <sub>3</sub> def, vC1-O1, ring H torsions                                                                                                        |
| 1310 | 15  | 254  | ring H torsions, C4-OH4 bend, C6-OH6 bend                                                                                                           |
| 1311 | 21  | -101 | ring H torsions, C6-OH6 bend                                                                                                                        |
| 1330 | 14  | -39  | ring H torsions, C6-OH6 bend, C3-OH3 bend, C5-O5-H bend                                                                                             |
| 1347 | 17  | -76  | ring H torsions, vC2-C3, C2-OH2 bend, C3-OH3 bend                                                                                                   |
| 1363 | 21  | -103 | ring H torsions, v <sub>as</sub> C2-C3-C4, C3-OH3 bend                                                                                              |
| 1380 | 21  | 161  | ring H torsions                                                                                                                                     |
| 1394 | 8   | -91  | ring H torsions, CH <sub>3</sub> def, vC1-C2, vC4-C5, C4-OH4 bend<br>ring H torsions, v <sub>as</sub> C4-C5-C6, vC1-C2, C2-OH2 bend, vC5-C6, C4-OH4 |
| 1409 | 16  | 228  | bend                                                                                                                                                |
| 1446 | 26  | 12   | CH <sub>3</sub> def                                                                                                                                 |
| 1452 | 13  | 72   | CH <sub>3</sub> def, ring H torsion                                                                                                                 |
| 1468 | 20  | -134 | CH <sub>3</sub> def                                                                                                                                 |
| 2199 | 222 | 210  | vCD                                                                                                                                                 |
| 2210 | 560 | -832 | vCD                                                                                                                                                 |
| 2216 | 20  | 649  | vCD                                                                                                                                                 |
| 2232 | 218 | -71  | vCD                                                                                                                                                 |
| 2318 | 206 | 87   | vCD                                                                                                                                                 |

---

**CH<sub>3</sub>-β-Glc-d<sub>5</sub> (gg conformer)**

| wavenumber<br>[cm <sup>-1</sup> ] | intensity (arb. units) |      |                                                                 |
|-----------------------------------|------------------------|------|-----------------------------------------------------------------|
|                                   | Raman                  | ROA  | Modes                                                           |
| 212                               | 2                      | 13   | OH twist, CD <sub>2</sub> bend                                  |
| 224                               | 3                      | -17  | CD <sub>2</sub> bend, OH <sub>4</sub> twist                     |
| 256                               | 2                      | -12  | OH <sub>4</sub> twist, OH <sub>6</sub> twist                    |
| 268                               | 2                      | -14  | OH <sub>2</sub> twist                                           |
| 280                               | 4                      | 60   | OH <sub>3</sub> twist                                           |
| 297                               | 6                      | 3    | OH <sub>4</sub> twist                                           |
| 314                               | 3                      | -79  | OH <sub>6</sub> twist, OH <sub>4</sub> twist                    |
| 331                               | 5                      | 47   | OH <sub>6</sub> twist                                           |
| 338                               | 11                     | -20  | OH <sub>3</sub> twist, C1-O1-C bend                             |
| 408                               | 13                     | -23  | ring def                                                        |
| 418                               | 10                     | 2    | ring def, C1-O1-C bend                                          |
| 432                               | 25                     | -63  | ring def                                                        |
| 500                               | 20                     | -21  | ring def                                                        |
| 536                               | 16                     | 73   | ring def                                                        |
| 558                               | 6                      | 32   | C1-O1-C bend, ring D torsions                                   |
| 660                               | 2                      | 34   | C5-C6-O6 bend                                                   |
| 792                               | 6                      | -12  | CD <sub>2</sub> bend, C6-OH <sub>6</sub> bend                   |
| 866                               | 7                      | 8    | CD <sub>2</sub> bend, νC5-C6                                    |
| 882                               | 11                     | -74  | ring D torsions, CD <sub>2</sub> bend                           |
| 893                               | 8                      | 151  | CD <sub>2</sub> bend, ring D torsions                           |
| 936                               | 7                      | 123  | ring D torsions, C2-OH <sub>2</sub> bend                        |
| 953                               | 20                     | -93  | ring D torsions                                                 |
| 955                               | 9                      | 134  | ring D torsions                                                 |
| 956                               | 23                     | -55  | ring D torsions                                                 |
| 972                               | 4                      | -72  | ring D torsions                                                 |
| 983                               | 17                     | 49   | CD <sub>2</sub> bend, νC6-O6                                    |
| 1006                              | 7                      | 181  | νC3-O3, νO1-C                                                   |
| 1039                              | 22                     | 151  | CD <sub>2</sub> bend, νC4-O4, νO1-C, νC2-O2, ring def           |
| 1050                              | 17                     | -34  | νC1-O5, ring def, CD <sub>2</sub> bend, C4-OH <sub>4</sub> bend |
| 1061                              | 21                     | -21  | CH <sub>3</sub> def, ring def, C4-OH <sub>4</sub> bend          |
| 1079                              | 17                     | 1    | νC5-O5, ring def                                                |
| 1083                              | 24                     | -24  | CD <sub>2</sub> bend                                            |
| 1099                              | 20                     | -317 | ring def, νC5-O5, νC4-O4, νC3-O3, νO1-C                         |

|      |     |      |                                                                                                                    |
|------|-----|------|--------------------------------------------------------------------------------------------------------------------|
| 1122 | 17  | 5    | $v_{as}C4-C5-O5$ , C4-OH4 bend, ring def                                                                           |
| 1154 | 15  | -151 | CH <sub>3</sub> def, $v_{O1-C}$ , $v_{C2-O2}$ , C3-OH3 bend, ring def                                              |
| 1156 | 6   | -55  | CH <sub>3</sub> def                                                                                                |
| 1176 | 33  | -156 | C3-OH3 bend, $v_{C4-O4}$ , ring def                                                                                |
| 1184 | 27  | 301  | ring breathing, $v_{as}C2-C3-O3$ , C2-OH2 bend, $v_{C2-O2}$                                                        |
| 1196 | 35  | 94   | $v_{C1-C2}$ , CH <sub>3</sub> def, $v_{C3-O3}$ , C4-OH4 bend                                                       |
| 1214 | 9   | -68  | $v_{as}C5-C6-O6$ , CH <sub>3</sub> def, $v_{C1-O1}$ , $v_{C4-O4}$ , C3-OH3 bend                                    |
| 1231 | 10  | 3    | $v_{C1-O1}$ , CH <sub>3</sub> def, ring H torsion                                                                  |
| 1296 | 13  | 139  | ring H torsions, C6-OH6 bend                                                                                       |
| 1308 | 16  | 172  | ring H torsions, C4-OH4 bend                                                                                       |
| 1332 | 25  | -203 | ring H torsions, C4-OH4 bend, C2-OH2 bend<br>ring H torsions, C2-OH2 bend, $v_{C3-O3}$ , C3-OH3 bend, C4-OH4 bend, |
| 1349 | 21  | -115 | $v_sC2-C3-C4$                                                                                                      |
| 1363 | 21  | 112  | ring def, $v_{as}C2-C3-C4$ , C3-OH3 bend, C4-OH4 bend                                                              |
| 1366 | 23  | -55  | ring H torsions                                                                                                    |
| 1393 | 10  | -37  | ring H torsions, $v_{C1-C2}$ , $v_{C4-C5}$ , C4-OH4 bend                                                           |
| 1408 | 17  | 245  | ring H torsions, $v_{C4-C5}$ , C4-OH4 bend, CH <sub>3</sub> def, $v_{C1-C2}$                                       |
| 1445 | 30  | 38   | CH <sub>3</sub> def                                                                                                |
| 1450 | 9   | 42   | CH <sub>3</sub> def                                                                                                |
| 1467 | 21  | -97  | CH <sub>3</sub> def                                                                                                |
| 2210 | 403 | 201  | $v_{CD}$                                                                                                           |
| 2210 | 383 | -89  | $v_{CD}$                                                                                                           |
| 2228 | 5   | -94  | $v_{CD}$                                                                                                           |
| 2234 | 313 | 185  | $v_{CD}$                                                                                                           |
| 2318 | 218 | 137  | $v_{CD}$                                                                                                           |

---

(e) **CH<sub>3</sub>- $\alpha$ -Glc-*d*<sub>5</sub>** (*gt* conformer)

| wavenumber<br>[cm <sup>-1</sup> ] | intensity (arb. units) |      | Modes                                                          |
|-----------------------------------|------------------------|------|----------------------------------------------------------------|
|                                   | Raman                  | ROA  |                                                                |
| 204                               | >0                     | 8    | OH2 twist, OH3 twist, C1-O1-C twist                            |
| 238                               | 2                      | 15   | OH4 twist, OH2 twist                                           |
| 297                               | 5                      | 51   | OH twist                                                       |
| 306                               | 7                      | -54  | OH4 twist                                                      |
| 313                               | 4                      | -31  | OH6 twist, OH4 twist                                           |
| 334                               | 7                      | -107 | OH6 twist, OH3 twist                                           |
| 363                               | 21                     | 97   | OH6 twist                                                      |
| 386                               | 7                      | 118  | OH2 twist                                                      |
| 396                               | 8                      | -106 | ring def, OH6 twist                                            |
| 402                               | 10                     | -25  | ring def                                                       |
| 429                               | 12                     | 15   | ring def, OH2 twist                                            |
| 516                               | 8                      | 4    | ring def                                                       |
| 539                               | 17                     | -19  | ring def                                                       |
| 565                               | 5                      | -6   | ring def, ring D torsions                                      |
| 641                               | 9                      | 111  | ring def, O5-C1-O1 bend, CD <sub>2</sub> bend                  |
| 721                               | 21                     | 17   | CD <sub>2</sub> bend, ring def                                 |
| 750                               | 10                     | 36   | CD <sub>2</sub> bend, ring def                                 |
| 823                               | 19                     | -173 | ring D torsions, ring def                                      |
| 882                               | 7                      | -109 | CD <sub>2</sub> bend, C6-OH6 bend                              |
| 894                               | 11                     | 32   | ring D torsions                                                |
| 926                               | 6                      | 131  | ring D torsions, CD <sub>2</sub> bend                          |
| 936                               | 12                     | 0    | ring D torsion, C2-OH2 bend                                    |
| 952                               | 14                     | -166 | ring D torsions                                                |
| 964                               | 15                     | -54  | ring D torsions                                                |
| 980                               | 14                     | 43   | CD <sub>2</sub> bend, vC6-O6, ring D torsions                  |
| 996                               | 11                     | -28  | ring def, ring D torsions                                      |
| 1012                              | 13                     | -196 | ring def, ring D torsions, vC4-O4                              |
| 1017                              | 6                      | 208  | ring def, CD <sub>2</sub> bend                                 |
| 1035                              | 19                     | -30  | v <sub>s</sub> C1-O1-C, vC1-O5, ring def, CD <sub>2</sub> bend |
| 1055                              | 13                     | 243  | CD <sub>2</sub> bend, ring def                                 |
| 1076                              | 2                      | 14   | vC1-O5, ring def, CD <sub>2</sub> bend, C4-OH4 bend            |
| 1093                              | 16                     | 225  | v <sub>as</sub> C1-O5-C5, vO1-C, CD <sub>2</sub> bend          |
| 1115                              | 12                     | -45  | O1-C bend, vC4-O4, C4-OH4 bend, ring def                       |
| 1129                              | 43                     | -248 | vC6-O6, CD <sub>2</sub> bend, vC3-O3, CH <sub>3</sub> def      |

|      |     |      |                                                                           |
|------|-----|------|---------------------------------------------------------------------------|
| 1151 | 18  | -7   | ring def, vC2-O2, vC3-O3, C4-OH4 bend                                     |
| 1158 | 4   | 15   | CH <sub>3</sub> def                                                       |
| 1174 | 33  | -323 | C3-OH3 bend, v <sub>as</sub> C3-C4-O4, v <sub>as</sub> C5-C6-O6, ring def |
| 1186 | 27  | 20   | ring def, C3-OH3 bend, vC5-C6                                             |
| 1196 | 24  | -124 | ring breathing, vC2-O2, vC4-O4                                            |
| 1201 | 4   | -95  | CH <sub>3</sub> def                                                       |
| 1255 | 33  | -207 | v <sub>as</sub> C1-C2-C3, C2-OH2 bend, ring def                           |
| 1311 | 26  | 106  | C6-OH6 bend                                                               |
| 1317 | 13  | 193  | ring H torsions, C2-OH2 bend, C4-OH4 bend                                 |
| 1326 | 13  | 137  | ring H torsions, C2-OH2 bend, C4-OH4 bend                                 |
| 1342 | 16  | -147 | ring H torsions, vC3-C4, C3-OH3 bend                                      |
| 1356 | 20  | 107  | ring H torsions, C3-OH3 bend                                              |
| 1372 | 15  | 26   | ring H torsion                                                            |
| 1383 | 10  | 194  | ring H torsion                                                            |
| 1408 | 20  | -142 | ring H torsions, vC4-C5, C4-C5-H bend                                     |
| 1442 | 17  | -56  | CH <sub>3</sub> def                                                       |
| 1450 | 25  | -11  | CH <sub>3</sub> def                                                       |
| 1467 | 20  | 17   | CH <sub>3</sub> def                                                       |
| 2199 | 201 | 206  | vCD                                                                       |
| 2208 | 507 | -464 | vCD                                                                       |
| 2223 | 126 | 222  | vCD                                                                       |
| 2274 | 207 | -100 | vCD                                                                       |
| 2318 | 199 | -24  | vCD                                                                       |

---

**CH<sub>3</sub>- $\alpha$ -Glc-*d*<sub>5</sub> (gg conformer)**

| wavenumber<br>[cm <sup>-1</sup> ] | intensity (arb. units) |      | Modes                                                              |
|-----------------------------------|------------------------|------|--------------------------------------------------------------------|
|                                   | Raman                  | ROA  |                                                                    |
| 204                               | >0                     | 10   | OH twist                                                           |
| 225                               | 2                      | -20  | OH6 twist, OH4 twist                                               |
| 251                               | 3                      | -11  | OH twist                                                           |
| 281                               | 2                      | 33   | OH3 twist, OH4 twist                                               |
| 303                               | 4                      | -61  | OH twist                                                           |
| 311                               | 6                      | 30   | OH4 twist, C1-O1-C bend, OH twist                                  |
| 330                               | 4                      | -9   | OH6 twist                                                          |
| 338                               | 7                      | -75  | ring def, OH3 twist, OH6 twist                                     |
| 384                               | 4                      | 73   | OH2 twist                                                          |
| 398                               | 11                     | 15   | ring def, OH twist                                                 |
| 430                               | 17                     | -25  | ring def, OH2 twist                                                |
| 476                               | 18                     | -55  | ring def, O3-C3-C4 bend, CD <sub>2</sub> bend                      |
| 493                               | 4                      | 34   | C3-D torsion, ring def                                             |
| 539                               | 15                     | -16  | ring breathing, O1-C1-O5 bend                                      |
| 588                               | 15                     | 100  | ring breathing, C4-D torsion                                       |
| 664                               | 11                     | 27   | ring D torsion, ring def                                           |
| 731                               | 10                     | -40  | ring def, CD <sub>2</sub> bend, $\nu$ C1-O1                        |
| 757                               | 12                     | 85   | CD <sub>2</sub> bend, ring def                                     |
| 820                               | 27                     | -154 | ring def, C2-D torsion                                             |
| 876                               | 11                     | -109 | CD <sub>2</sub> bend, ring def, C6-OH6 bend                        |
| 887                               | 4                      | 17   | ring D torsions, CD <sub>2</sub> bend                              |
| 897                               | 15                     | 176  | ring D torsions, CD <sub>2</sub> bend                              |
| 936                               | 13                     | -18  | C4-D torsion, C4-OH4 bend, $\nu$ C4-O4                             |
| 954                               | 14                     | -33  | C3-D torsion, C4-D torsions, C3-OH3 bend                           |
| 957                               | 18                     | 12   | C3-D torsion, C4-D torsions                                        |
| 977                               | 5                      | -52  | C3-D torsion, C4-D torsions, C3-OH3 bend, $\nu$ C2-O2              |
| 983                               | 18                     | 79   | $\nu$ C6-O6, CD <sub>2</sub> bend                                  |
| 1005                              | 23                     | -102 | ring D torsions, ring def, $\nu$ O1-C                              |
| 1016                              | 5                      | 56   | $\nu_{as}$ C1-O5-C5, C4-OH4 bend, CD <sub>2</sub> bend, ring def   |
| 1038                              | 15                     | -44  | $\nu_s$ C1-O1-CH <sub>3</sub> , ring def, $\nu$ C4-O4, C4-OH4 bend |
| 1041                              | 11                     | 247  | ring def, CD <sub>2</sub> bend, $\nu_{as}$ O5-C1-O1                |
| 1081                              | 16                     | -7   | CD <sub>2</sub> bend                                               |
| 1085                              | 13                     | -75  | $\nu_{as}$ C5-O5-C1, $\nu_{as}$ C1-O1-C, CD <sub>2</sub> bend      |
| 1102                              | 15                     | 140  | $\nu_{as}$ C4-C5-O5, C4-OH4 bend                                   |



|      |     |      |                                                    |
|------|-----|------|----------------------------------------------------|
| 1120 | 23  | -12  | CH <sub>3</sub> def, vO1-C, ring def, C4-OH4 bend  |
| 1149 | 18  | -38  | ring def, C4-OH4 bend, vC2-O2, vC3-O3, vO1-C       |
| 1159 | 3   | 49   | CH <sub>3</sub> def                                |
| 1174 | 38  | -400 | C3-OH3 bend, v <sub>as</sub> C3-C4-O4              |
| 1194 | 39  | 75   | v <sub>as</sub> C1-C2-O2                           |
| 1199 | 5   | -106 | CH <sub>3</sub> def                                |
| 1218 | 9   | -89  | CD <sub>2</sub> bend, v <sub>as</sub> C5-C6-O6     |
| 1256 | 31  | -246 | v <sub>as</sub> C1-C2-C3, C2-OH2 bend, C4-OH4 bend |
| 1297 | 12  | 7    | C6-OH6 bend, C5-H torsion                          |
| 1318 | 19  | 340  | ring H torsion, C2-OH2 bend                        |
| 1327 | 16  | 36   | ring H torsion, C2-OH2 bend, C4-OH4 bend           |
| 1337 | 36  | -249 | C4-OH4 bend, C5-H torsion, C6-OH6 bend             |
| 1353 | 13  | 98   | C3-OH3 bend, C4-OH4 bend, ring H torsions, vC2-C3  |
| 1373 | 15  | 72   | C1-H torsion                                       |
| 1384 | 11  | 160  | C1-H torsion, C3-OH3 bend, vC1-C2                  |
| 1409 | 17  | -44  | vC4-C5, C4-OH4 bend, ring H torsion                |
| 1444 | 14  | -56  | CH <sub>3</sub> def                                |
| 1449 | 27  | -12  | CH <sub>3</sub> def                                |
| 1468 | 21  | 42   | CH <sub>3</sub> def                                |
| 2209 | 411 | 271  | vCD                                                |
| 2218 | 449 | -145 | vCD                                                |
| 2227 | 22  | 254  | vCD                                                |
| 2274 | 201 | -92  | vCD                                                |
| 2317 | 210 | 56   | vCD                                                |

---

## Optimized Cartesian Coordinates

CD<sub>3</sub>-β-Glc conformer 1 calculated at B3LYP/spAug-cc-pVDZ

ΔE 0.000 kcal/mol, P 44.2%

|    |   |           |           |           |
|----|---|-----------|-----------|-----------|
| 1  | C | 1.428409  | -0.738454 | -0.206203 |
| 2  | C | -1.042562 | -1.15571  | -0.268371 |
| 3  | O | -0.152604 | 1.076704  | -0.316756 |
| 4  | C | -1.228679 | 0.290569  | 0.175336  |
| 5  | C | 1.111272  | 0.691337  | 0.22429   |
| 6  | C | 0.302576  | -1.669396 | 0.216834  |
| 7  | H | -1.071081 | -1.179217 | -1.371333 |
| 8  | H | 1.068843  | 0.740129  | 1.328162  |
| 9  | H | 0.28375   | -1.714356 | 1.320896  |
| 10 | H | 1.514322  | -0.767282 | -1.307588 |
| 11 | C | 2.119718  | 1.701346  | -0.284089 |
| 12 | H | 3.113536  | 1.463383  | 0.112658  |
| 13 | H | 2.162871  | 1.647561  | -1.385849 |
| 14 | O | -2.039136 | -2.002259 | 0.276137  |
| 15 | H | -2.897667 | -1.721073 | -0.073835 |
| 16 | O | 0.603521  | -2.954561 | -0.306008 |
| 17 | H | -0.06679  | -3.576573 | 0.013882  |
| 18 | O | 2.656193  | -1.122242 | 0.389437  |
| 19 | H | 2.779805  | -2.067949 | 0.215082  |
| 20 | O | 1.799378  | 3.015429  | 0.143905  |
| 21 | H | 0.881788  | 3.184638  | -0.119496 |
| 22 | H | -1.250153 | 0.360283  | 1.281897  |
| 23 | O | -2.413495 | 0.757311  | -0.364385 |
| 24 | C | -2.877402 | 1.979635  | 0.20472   |
| 25 | D | -3.000022 | 1.875325  | 1.29441   |
| 26 | D | -3.848272 | 2.192616  | -0.253998 |
| 27 | D | -2.181777 | 2.803495  | -0.008635 |

**CD<sub>3</sub>-β-Glc conformer 2** calculated at B3LYP/spAug-cc-pVDZ

$\Delta E$  0.207 kcal/mol,  $P$  31.2%

|    |   |           |           |           |
|----|---|-----------|-----------|-----------|
| 1  | C | 1.45685   | 0.494706  | 0.001905  |
| 2  | C | -0.93611  | 1.125092  | 0.365319  |
| 3  | O | -0.291086 | -1.168716 | 0.017847  |
| 4  | C | -1.3133   | -0.218838 | -0.245411 |
| 5  | C | 0.965179  | -0.833541 | -0.572066 |
| 6  | C | 0.404048  | 1.573668  | -0.189776 |
| 7  | H | -0.858513 | 0.993609  | 1.458286  |
| 8  | H | 0.854127  | -0.732139 | -1.667536 |
| 9  | H | 0.289904  | 1.766608  | -1.27218  |
| 10 | H | 1.64068   | 0.366732  | 1.082182  |
| 11 | C | 1.894321  | -1.999622 | -0.28859  |
| 12 | H | 1.506563  | -2.893587 | -0.803638 |
| 13 | H | 2.892551  | -1.776316 | -0.683692 |
| 14 | O | -1.884524 | 2.128252  | 0.047683  |
| 15 | H | -2.730757 | 1.881787  | 0.449934  |
| 16 | O | 0.882045  | 2.746329  | 0.453166  |
| 17 | H | 0.247072  | 3.459892  | 0.291343  |
| 18 | O | 2.662513  | 0.839489  | -0.661195 |
| 19 | H | 2.902975  | 1.734615  | -0.377251 |
| 20 | O | 2.042874  | -2.24685  | 1.101295  |
| 21 | H | 1.154674  | -2.376385 | 1.467439  |
| 22 | H | -1.443195 | -0.125159 | -1.342911 |
| 23 | O | -2.48799  | -0.646962 | 0.346648  |
| 24 | C | -3.127051 | -1.726593 | -0.330847 |
| 25 | D | -2.502395 | -2.630669 | -0.309095 |
| 26 | D | -3.340872 | -1.452868 | -1.376261 |
| 27 | D | -4.067085 | -1.917687 | 0.196623  |

**CD<sub>3</sub>-β-Glc conformer 3** calculated at B3LYP/spAug-cc-pVDZ

$\Delta E$  0.349 kcal/mol, *P* 24.6%

|    |   |           |           |           |
|----|---|-----------|-----------|-----------|
| 1  | C | -1.266921 | 0.618593  | -0.258288 |
| 2  | C | 1.191556  | 1.032526  | -0.242406 |
| 3  | O | 0.291348  | -1.203695 | -0.341544 |
| 4  | C | 1.357968  | -0.422948 | 0.180989  |
| 5  | C | -0.975204 | -0.81777  | 0.178657  |
| 6  | C | -0.163531 | 1.549909  | 0.211344  |
| 7  | H | 1.249864  | 1.074571  | -1.343644 |
| 8  | H | -0.961987 | -0.865964 | 1.283487  |
| 9  | H | -0.177909 | 1.587135  | 1.315538  |
| 10 | H | -1.308954 | 0.645309  | -1.36159  |
| 11 | C | -2.001843 | -1.814808 | -0.343161 |
| 12 | H | -2.094466 | -1.706887 | -1.438264 |
| 13 | H | -1.647225 | -2.831845 | -0.131932 |
| 14 | O | 2.179219  | 1.861986  | 0.342616  |
| 15 | H | 3.044554  | 1.58115   | 0.009495  |
| 16 | O | -0.446678 | 2.837686  | -0.313757 |
| 17 | H | 0.215303  | 3.457078  | 0.02772   |
| 18 | O | -2.52771  | 0.998672  | 0.281129  |
| 19 | H | -2.697059 | 1.920656  | 0.033752  |
| 20 | O | -3.260858 | -1.666969 | 0.293583  |
| 21 | H | -3.476721 | -0.718046 | 0.278807  |
| 22 | H | 1.357486  | -0.508789 | 1.2868    |
| 23 | O | 2.551899  | -0.885663 | -0.341745 |
| 24 | C | 2.996049  | -2.122365 | 0.211972  |
| 25 | D | 3.091152  | -2.04234  | 1.306494  |
| 26 | D | 3.977552  | -2.329501 | -0.226412 |
| 27 | D | 2.302224  | -2.93749  | -0.037147 |

**CD<sub>3</sub>- $\alpha$ -Glc conformer 1** calculated at B3LYP/spAug-cc-pVDZ $\Delta E$  0.000 kcal/mol,  $P$  39.0%

|    |   |           |           |           |
|----|---|-----------|-----------|-----------|
| 1  | C | 0.147233  | -1.533148 | -0.041596 |
| 2  | C | -1.568123 | 0.193651  | -0.675826 |
| 3  | O | 0.815465  | 0.685093  | -0.791945 |
| 4  | C | -0.462109 | 1.256259  | -0.587811 |
| 5  | C | 1.168742  | -0.400898 | 0.097825  |
| 6  | C | -1.252644 | -0.994294 | 0.238298  |
| 7  | H | -1.617094 | -0.165113 | -1.715114 |
| 8  | H | 1.170699  | -0.033663 | 1.138207  |
| 9  | H | -1.292853 | -0.66228  | 1.29282   |
| 10 | H | 0.1747    | -1.915719 | -1.081078 |
| 11 | H | -0.565582 | 2.004161  | -1.393114 |
| 12 | C | 2.580768  | -0.816667 | -0.292901 |
| 13 | H | 2.914265  | -1.628109 | 0.366326  |
| 14 | H | 2.574231  | -1.195817 | -1.332319 |
| 15 | O | -0.598682 | 1.88214   | 0.670741  |
| 16 | O | -2.851069 | 0.7396    | -0.385455 |
| 17 | H | -2.734832 | 1.315517  | 0.389701  |
| 18 | O | -2.171487 | -2.067125 | 0.034629  |
| 19 | H | -3.067833 | -1.707842 | 0.129819  |
| 20 | O | 0.503082  | -2.566212 | 0.870256  |
| 21 | H | -0.233514 | -3.197639 | 0.887244  |
| 22 | O | 3.511423  | 0.248458  | -0.145538 |
| 23 | H | 3.192853  | 0.978767  | -0.697759 |
| 24 | C | 0.173393  | 3.074586  | 0.823121  |
| 25 | D | 1.25178   | 2.860586  | 0.766942  |
| 26 | D | -0.066717 | 3.480931  | 1.812787  |
| 27 | D | -0.093511 | 3.813649  | 0.047376  |

**CD<sub>3</sub>-α-Glc conformer 2** calculated at B3LYP/spAug-cc-pVDZ

$\Delta E$  0.052 kcal/mol,  $P$  35.7%

|    |   |           |           |           |
|----|---|-----------|-----------|-----------|
| 1  | C | -1.069887 | 0.953115  | 0.175831  |
| 2  | C | 1.245537  | 0.705451  | -0.769373 |
| 3  | O | -0.233648 | -1.223784 | -0.561565 |
| 4  | C | 1.118518  | -0.811322 | -0.568162 |
| 5  | C | -1.099613 | -0.56406  | 0.391943  |
| 6  | C | 0.368308  | 1.45819   | 0.234138  |
| 7  | H | 0.904921  | 0.946995  | -1.787613 |
| 8  | H | -0.757453 | -0.782586 | 1.418853  |
| 9  | H | 0.757187  | 1.287477  | 1.255914  |
| 10 | H | -1.491912 | 1.182881  | -0.81951  |
| 11 | H | 1.575032  | -1.362506 | -1.408557 |
| 12 | C | -2.478793 | -1.185565 | 0.191572  |
| 13 | H | -2.433193 | -2.251607 | 0.480329  |
| 14 | H | -3.19893  | -0.678415 | 0.846982  |
| 15 | O | 1.794115  | -1.123669 | 0.632985  |
| 16 | O | 2.601981  | 1.134745  | -0.695125 |
| 17 | H | 2.992841  | 0.677033  | 0.068828  |
| 18 | O | 0.343433  | 2.8577    | -0.044081 |
| 19 | H | 1.263221  | 3.161577  | -0.10003  |
| 20 | O | -1.868154 | 1.542693  | 1.197748  |
| 21 | H | -1.767785 | 2.504245  | 1.119542  |
| 22 | O | -2.960268 | -1.042722 | -1.138362 |
| 23 | H | -2.297882 | -1.441127 | -1.724077 |
| 24 | C | 2.035034  | -2.518918 | 0.822318  |
| 25 | D | 1.090783  | -3.083627 | 0.863149  |
| 26 | D | 2.565944  | -2.621276 | 1.7763    |
| 27 | D | 2.662924  | -2.92011  | 0.007478  |

**CD<sub>3</sub>- $\alpha$ -Glc** conformer 3 calculated at B3LYP/spAug-cc-pVDZ

$\Delta E$  0.257 kcal/mol,  $P$  25.3%

|    |   |           |           |           |
|----|---|-----------|-----------|-----------|
| 1  | C | 0.995921  | 0.935314  | 0.168343  |
| 2  | C | -1.462495 | 0.75953   | 0.592941  |
| 3  | O | 0.028077  | -1.149666 | 0.927342  |
| 4  | C | -1.294061 | -0.768616 | 0.602196  |
| 5  | C | 1.057686  | -0.594389 | 0.084609  |
| 6  | C | -0.380265 | 1.421964  | -0.266046 |
| 7  | H | -1.357667 | 1.121792  | 1.626947  |
| 8  | H | 0.900128  | -0.909607 | -0.961305 |
| 9  | H | -0.534158 | 1.147145  | -1.326366 |
| 10 | H | 1.162682  | 1.236794  | 1.220627  |
| 11 | H | -1.917193 | -1.228863 | 1.388302  |
| 12 | C | 2.388007  | -1.173279 | 0.574401  |
| 13 | H | 2.63459   | -0.747366 | 1.566044  |
| 14 | H | 2.274145  | -2.259343 | 0.699043  |
| 15 | O | -1.705658 | -1.228458 | -0.669034 |
| 16 | O | -2.765172 | 1.146126  | 0.168319  |
| 17 | H | -2.983423 | 0.581495  | -0.593117 |
| 18 | O | -0.39646  | 2.842074  | -0.127169 |
| 19 | H | -1.298243 | 3.146135  | -0.316513 |
| 20 | O | 2.031688  | 1.474938  | -0.656041 |
| 21 | H | 1.900512  | 2.43556   | -0.697695 |
| 22 | O | 3.440149  | -0.971991 | -0.356152 |
| 23 | H | 3.443613  | -0.027797 | -0.588712 |
| 24 | C | -1.88397  | -2.644119 | -0.750229 |
| 25 | D | -0.940126 | -3.175353 | -0.553725 |
| 26 | D | -2.222548 | -2.861121 | -1.770293 |
| 27 | D | -2.648241 | -2.982089 | -0.028648 |
